# Supplementary material
Source: PubMed Central journal article supplement (PMC6392427)
Supplement: NIHMS1521407-supplement-Supporting_Information.pdf [file NIHMS1521407-supplement-Supporting_Information.pdf]

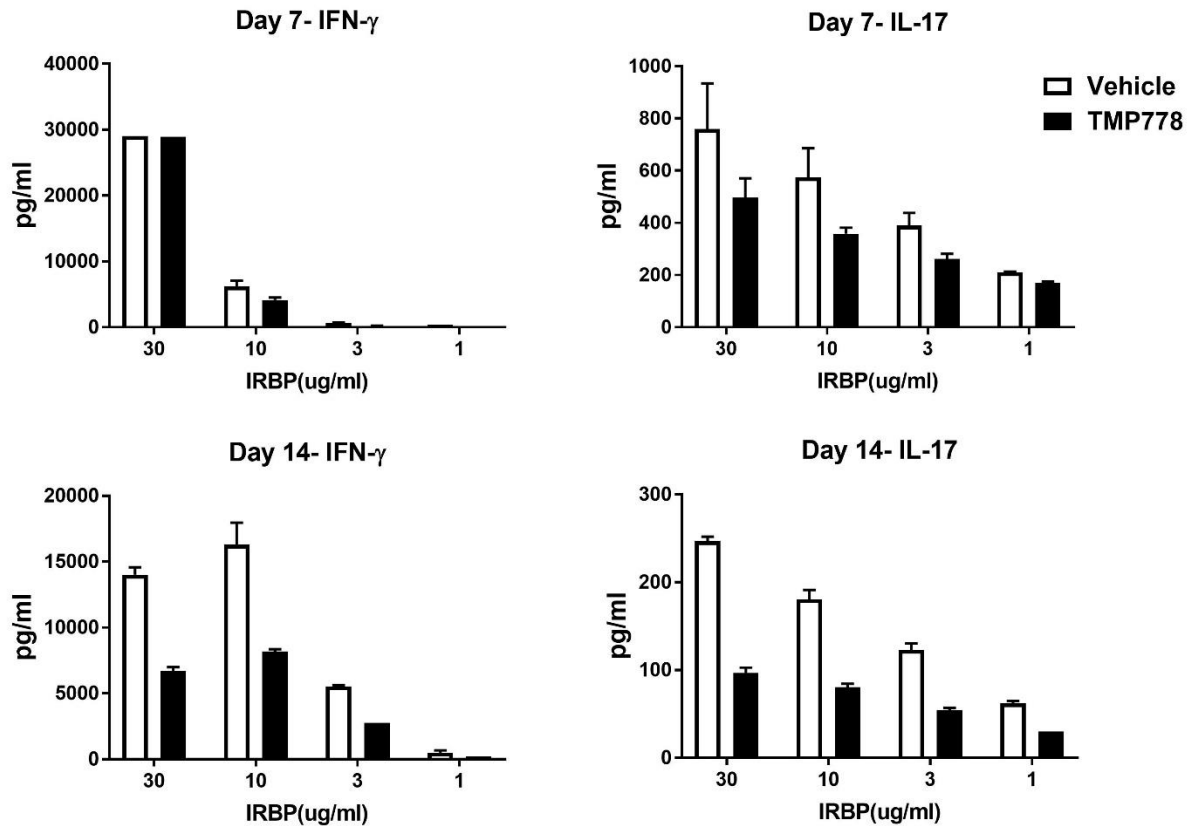

**Supporting Information Fig.1.** A representative experiment result of levels of IFN- $\gamma$  and IL-17 in supernatants of spleen cell cultures from mice immunized with IRBP and treated with TMP778 or the vehicle. Splenocytes were collected on days 7 or 14 post immunization and cultured with IRBP at the indicated concentrations. Supernatants were collected after 48 hrs of incubation and were analyzed for the levels of IL-17 and IFN- $\gamma$  using ELISA kits.

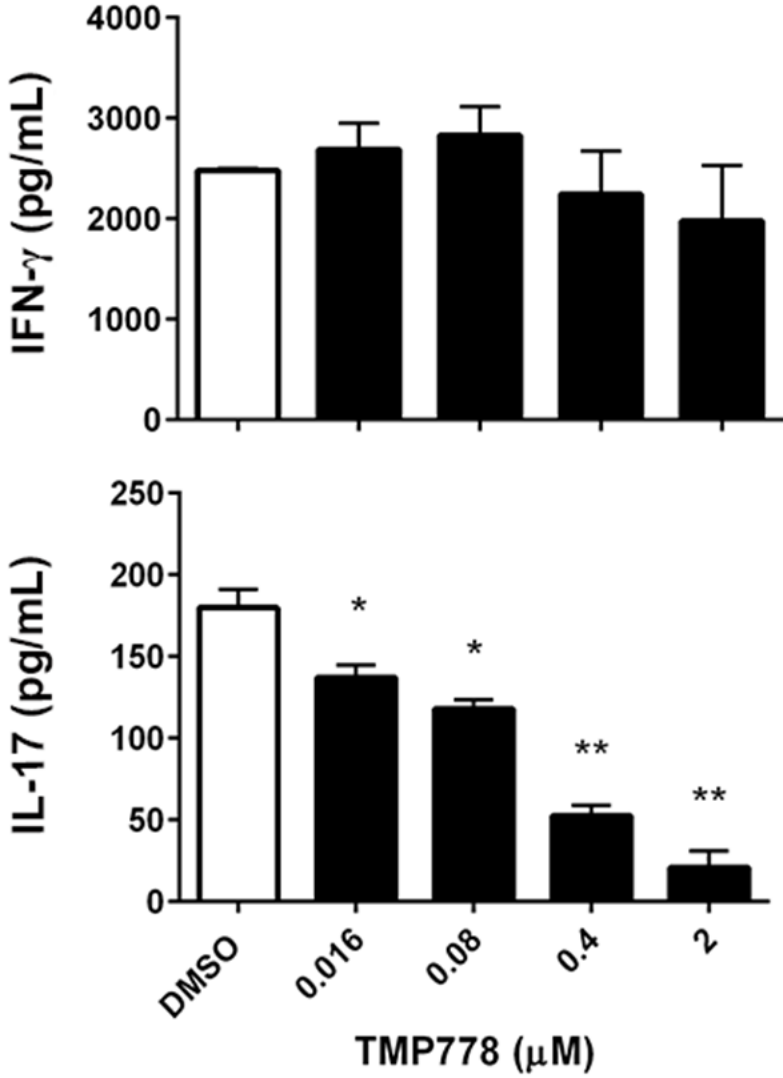

**Supporting Information Fig.2.** TMP778 selectively inhibits generation of Th17 cells, but not of Th1 cells, when added to cultures undergoing activation/polarization. Cultures of naïve CD4 cells were stimulated with anti-CD3/CD28 antibodies for 48 hrs in the presence of the indicated concentration of TMP778, or DMSO (the solvent control), at 1:1,000, and supernatants of the cultures were examined for the levels of IL-17 or IFN-γ. The compound inhibits by a dose-response manner the production of IL-17, but not of IFN-γ. A representative experiment; similar results were obtained in two additional experiments. \* $<0.05$ ; \*\* $<0.01$ .

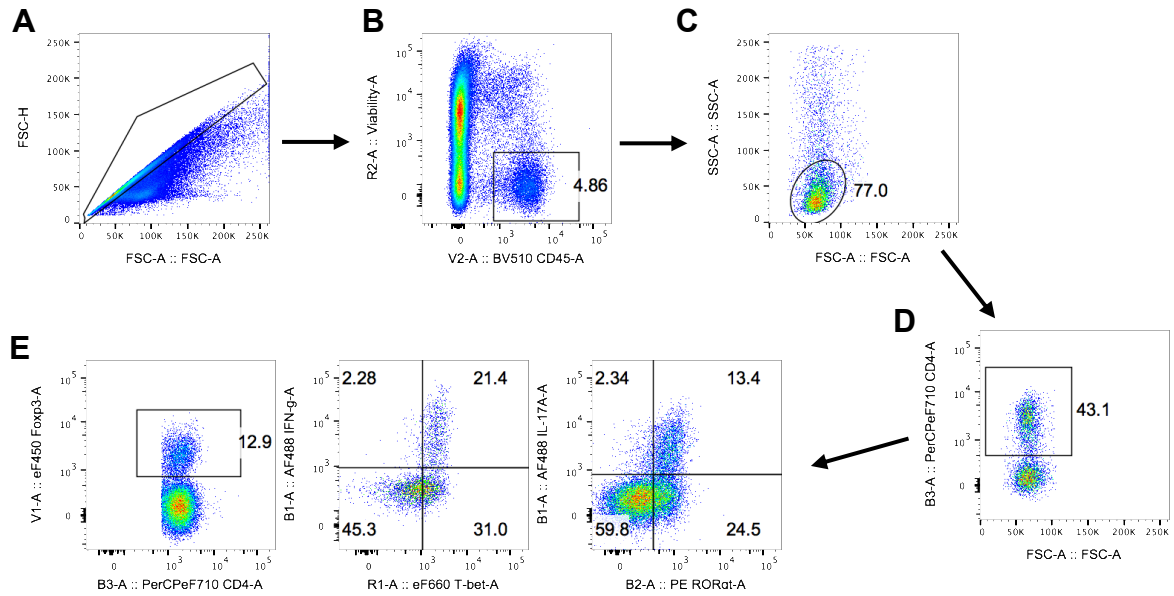

**Supporting Information Fig.3.** Representative gating strategy from eye-infiltrating cells. (A) single cells (FSC-A/FSC-H) (B) CD45 versus viability dye within the single cells allow detection of live CD45<sup>+</sup> cells. (C) Lymphocyte within the live CD45<sup>+</sup> cells (D) CD4<sup>+</sup> within the lymphocytes population. (E) Foxp3 versus CD4 profile, IFN- $\gamma$  versus Tbet, or Il-17A versus ROR $\gamma$ t profile within the CD4<sup>+</sup> population allow the identification of regulatory CD4<sup>+</sup> T cells , Tbet<sup>+</sup> or ROR $\gamma$ t<sup>+</sup> CD4<sup>+</sup> T cells.

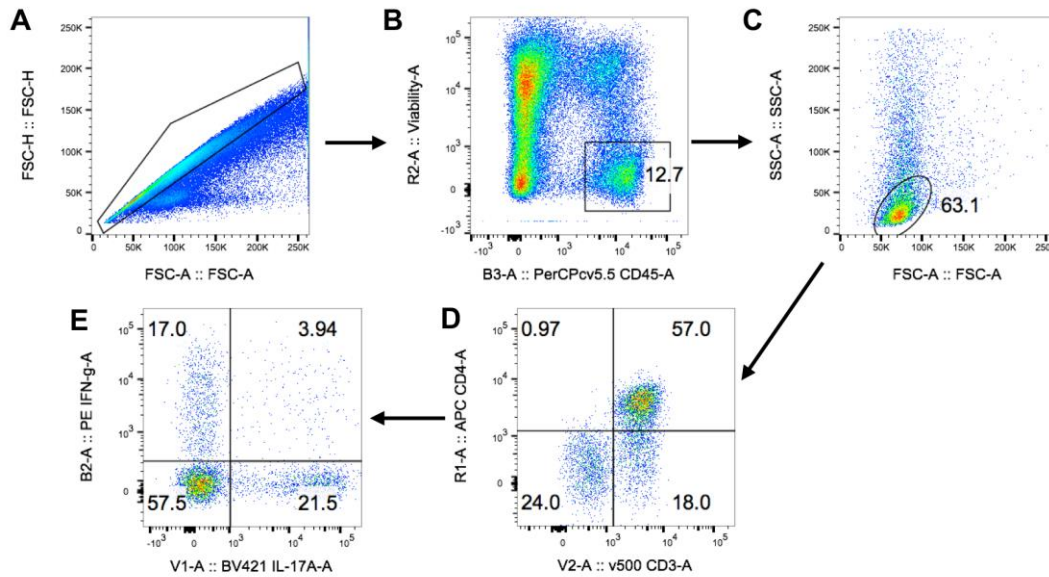

**Supporting Information Fig.4.** Representative gating strategy from eye-infiltrating cells. (A) single cells (FSC-A/FSC-H) (B) CD45 versus viability dye within the single cells allow detection of live CD45<sup>+</sup> cells. (C) Lymphocyte within the live CD45<sup>+</sup> cells (D) CD3 versus CD4 profile within the lymphocytes population allows the identification of CD4<sup>+</sup> T cells. (E) IFN- $\gamma$  versus IL-17A profile within the CD3<sup>+</sup>CD4<sup>+</sup> population allows the identification of IFN- $\gamma$  or/and IL-17A producing CD4<sup>+</sup> T cells.
